# Supplementary material
Source: PubMed Central journal article supplement (PMC6279478)

**A****USP6 Promoter Methylation**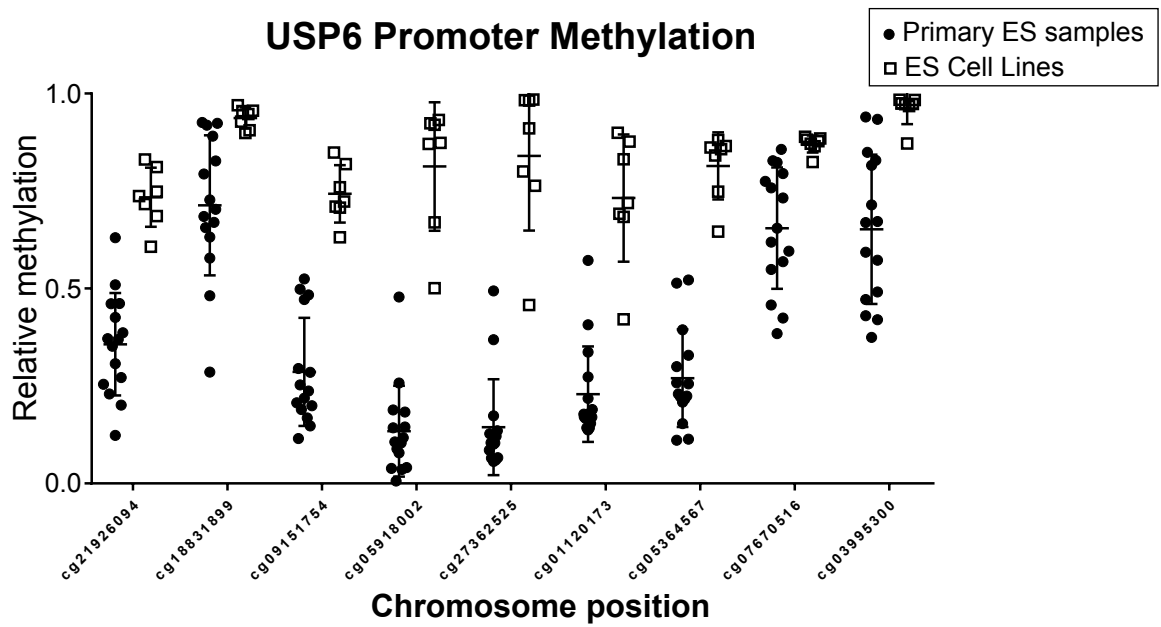**B**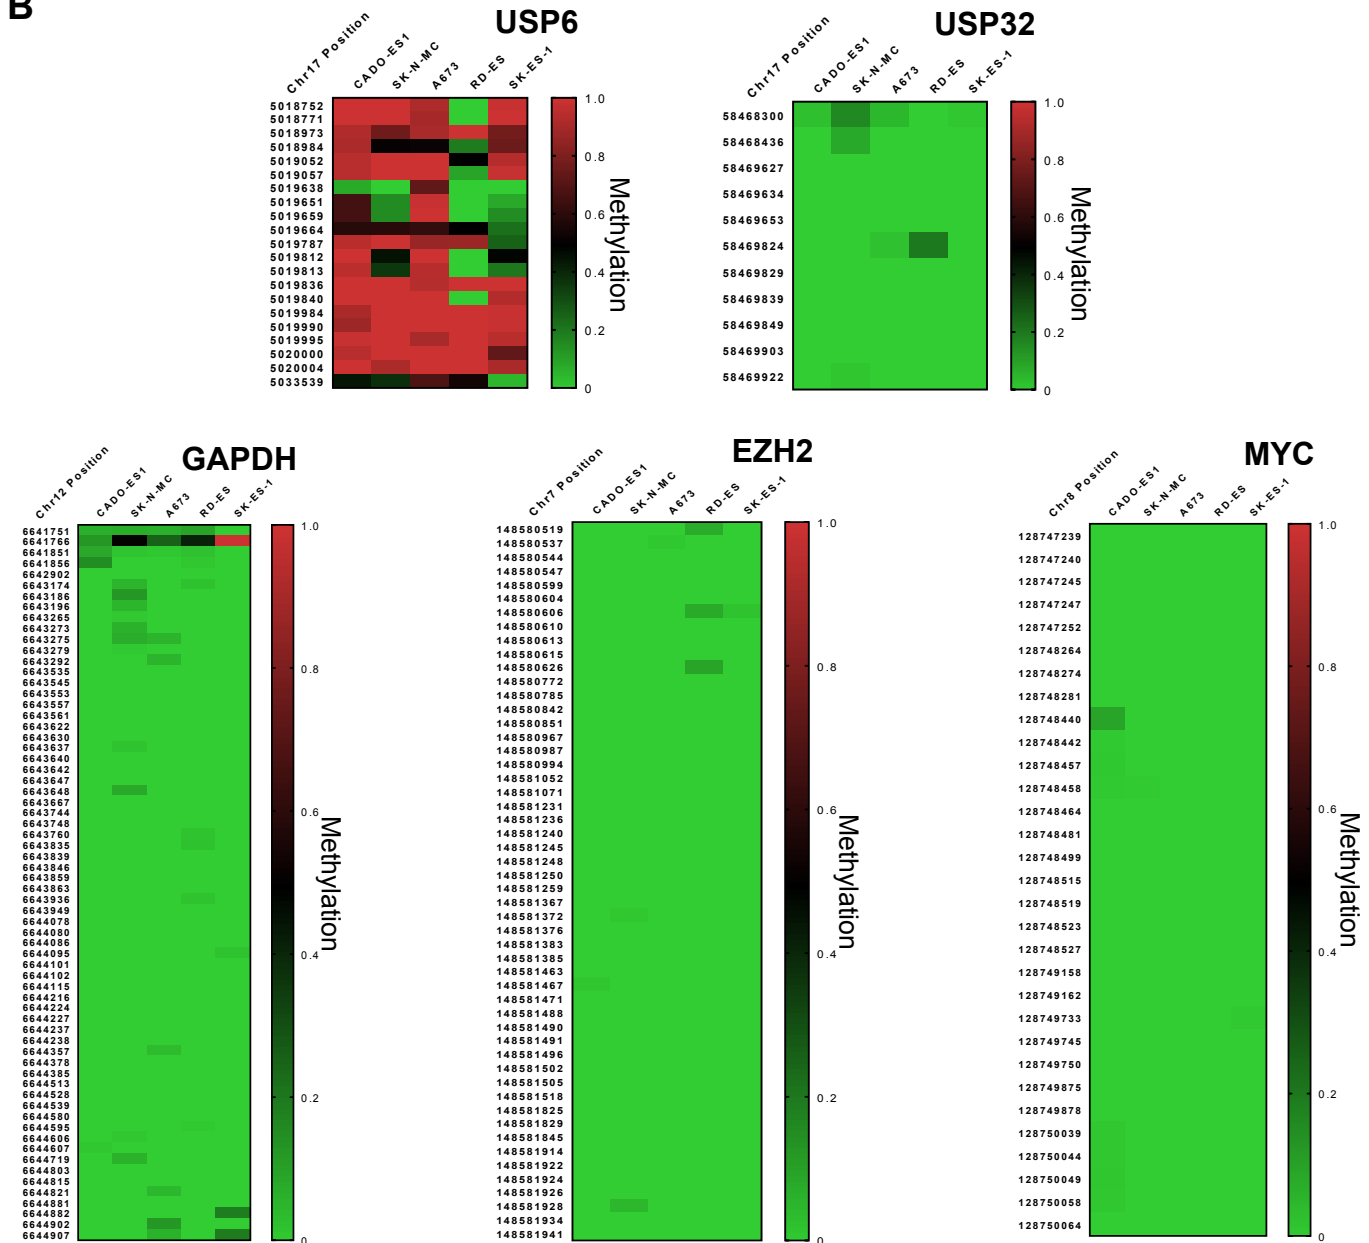**Supplemental Figure S1**

Supplement: NIHMS1503368-supplement-1.pdf [file NIHMS1503368-supplement-1.pdf]

### A IFN $\alpha$ Timecourse

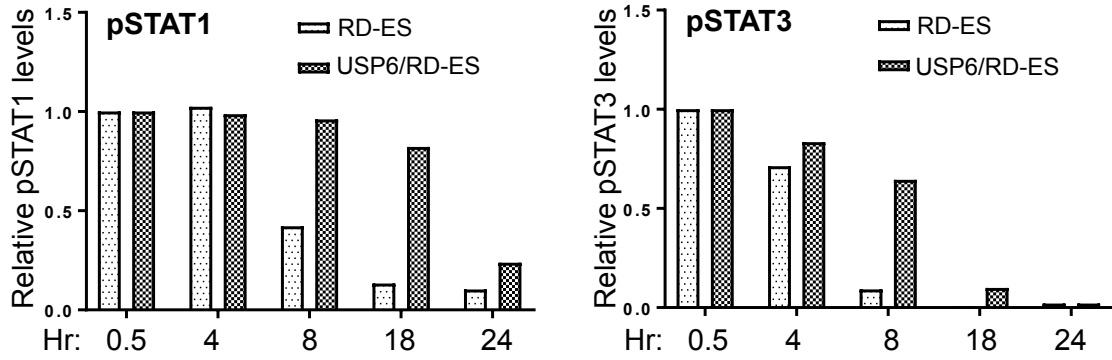

### B IFN $\gamma$ Timecourse

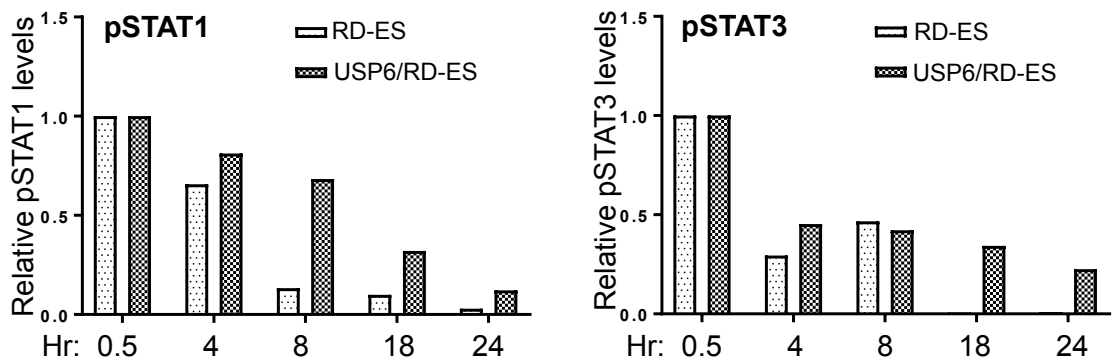

### C IFN $\beta$ Dose Response

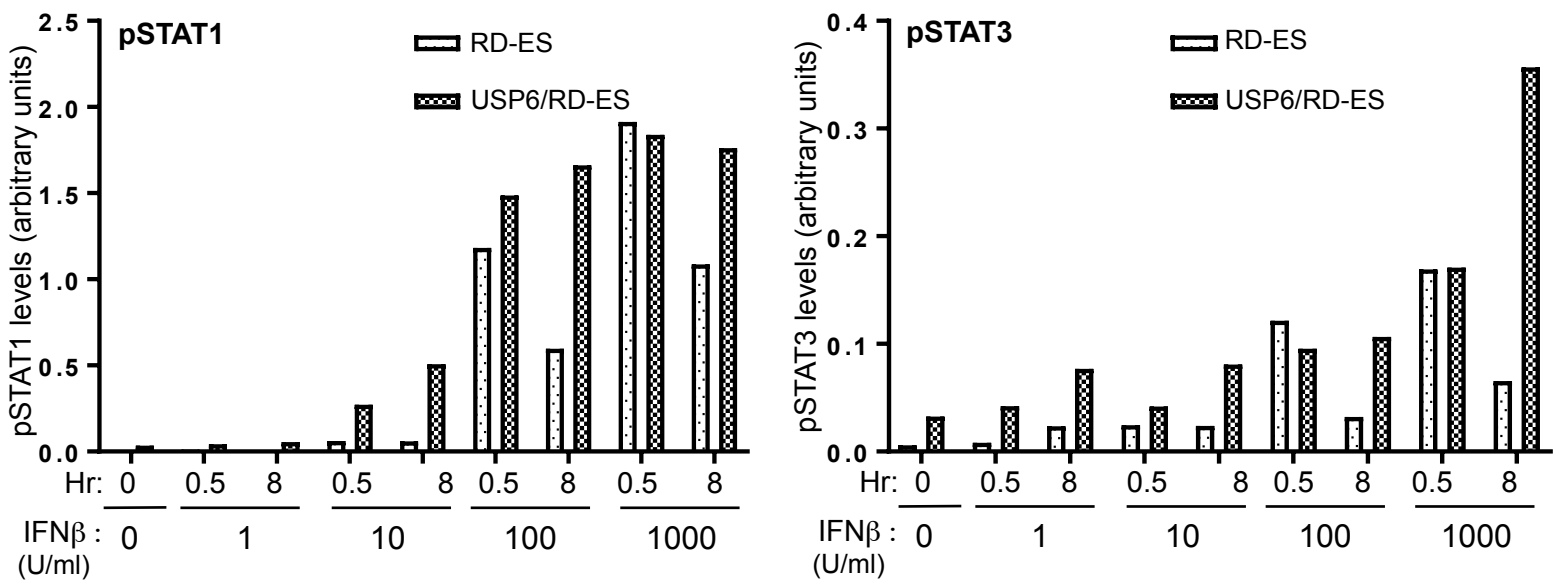

Supplement: NIHMS1503368-supplement-2.pdf [file NIHMS1503368-supplement-2.pdf]

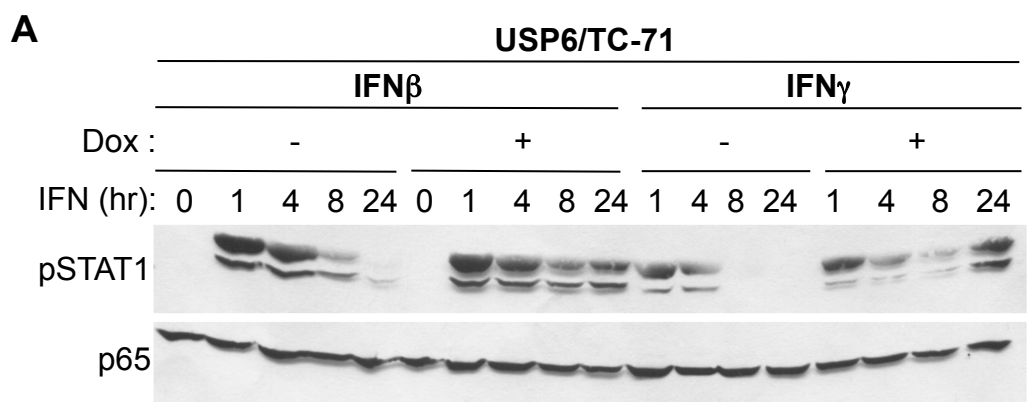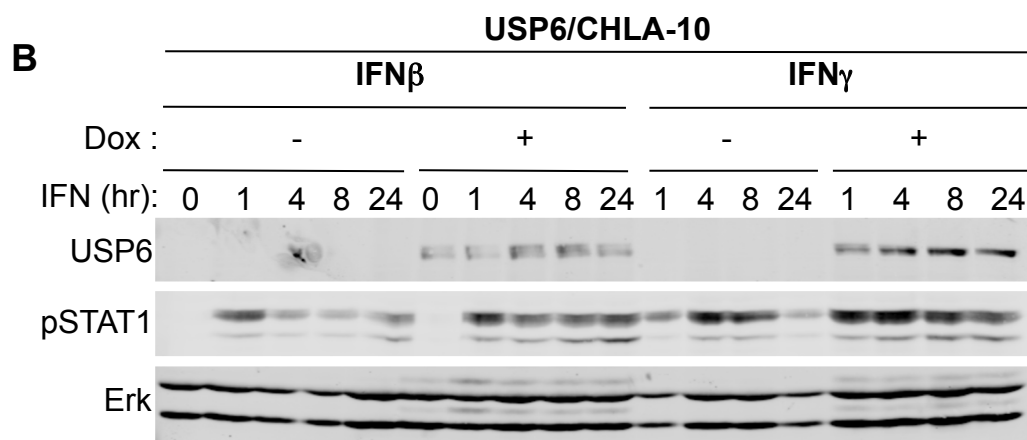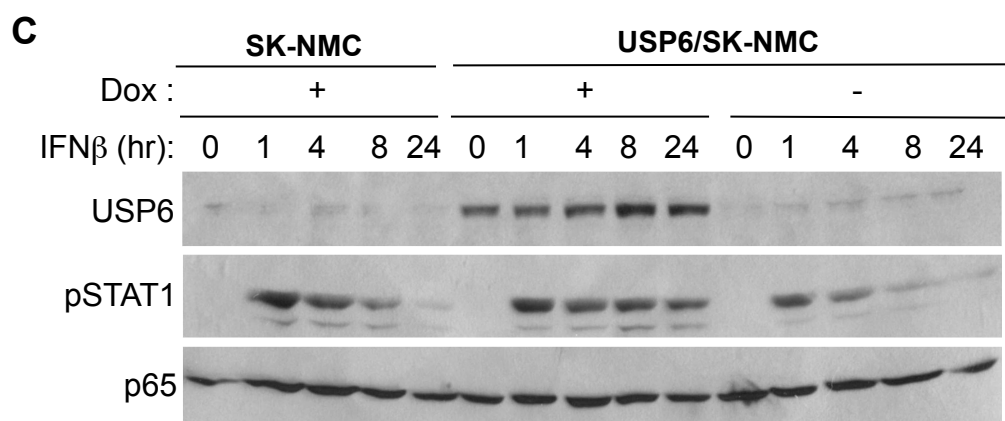

**Supplemental Figure S3**

Supplement: NIHMS1503368-supplement-3.pdf [file NIHMS1503368-supplement-3.pdf]

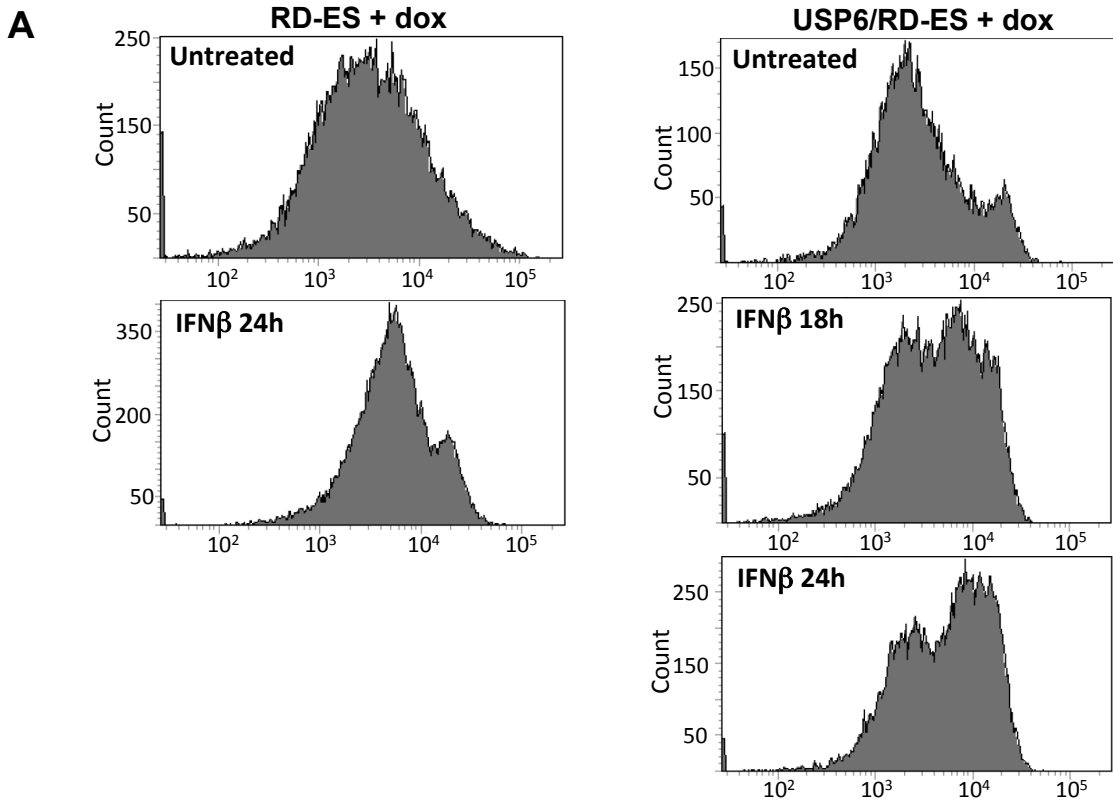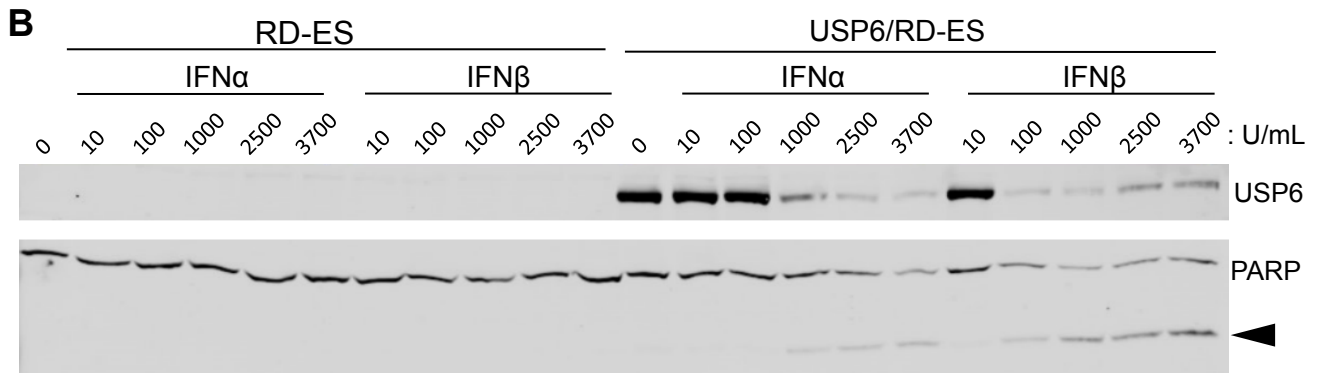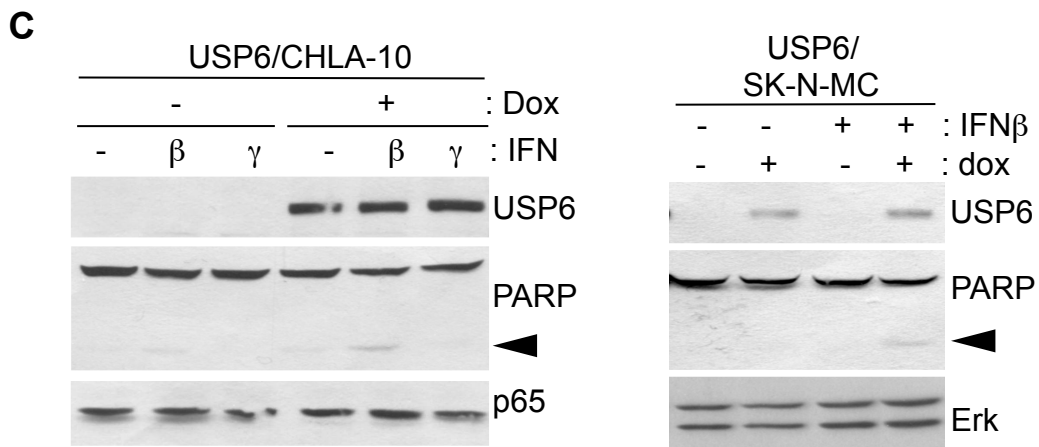

Supplemental Figure S4

Supplement: NIHMS1503368-supplement-4.pdf [file NIHMS1503368-supplement-4.pdf]

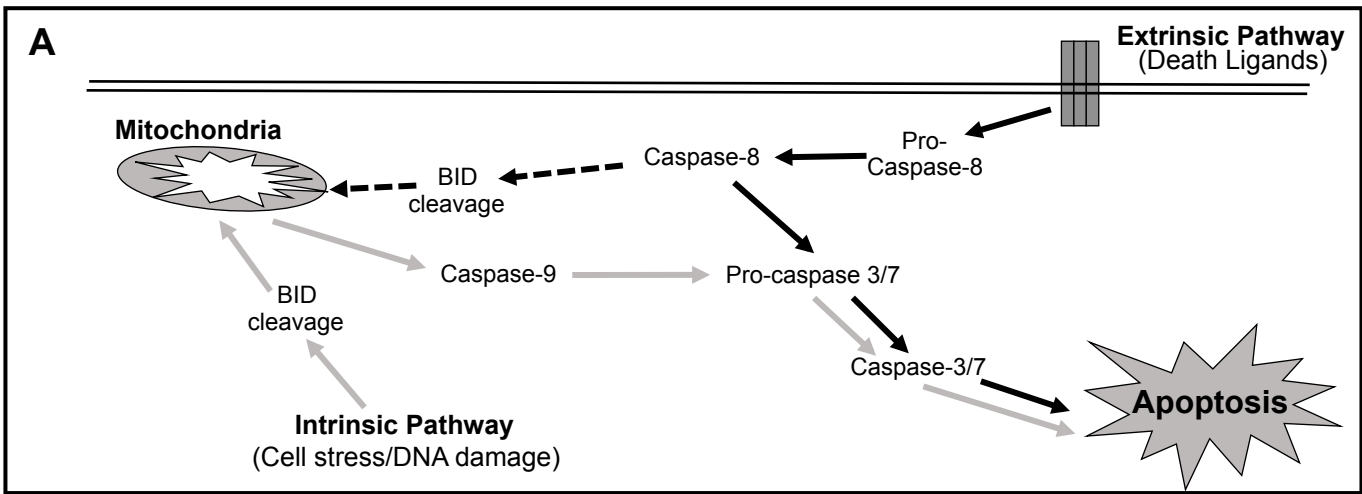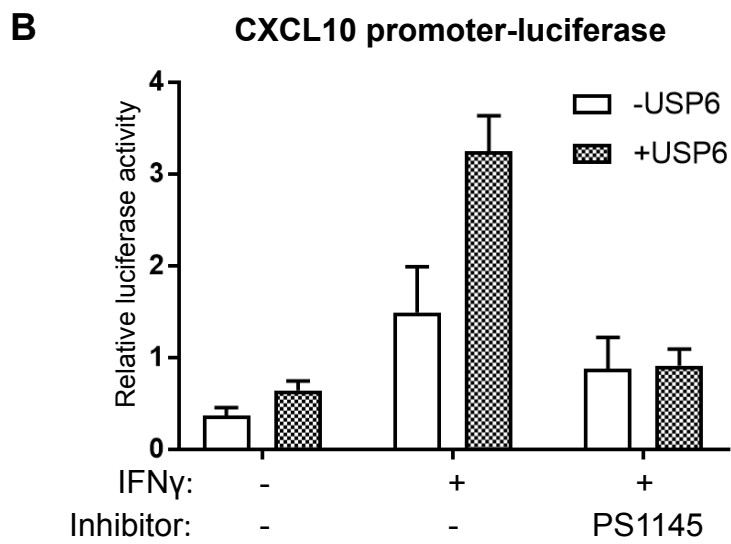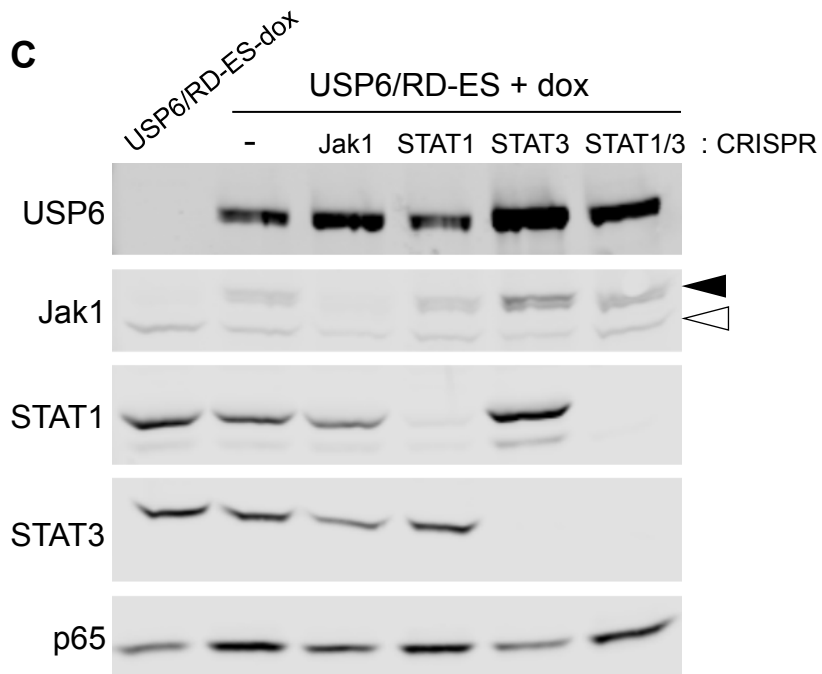

**Supplemental Figure S5**

Supplement: NIHMS1503368-supplement-5.pdf [file NIHMS1503368-supplement-5.pdf]

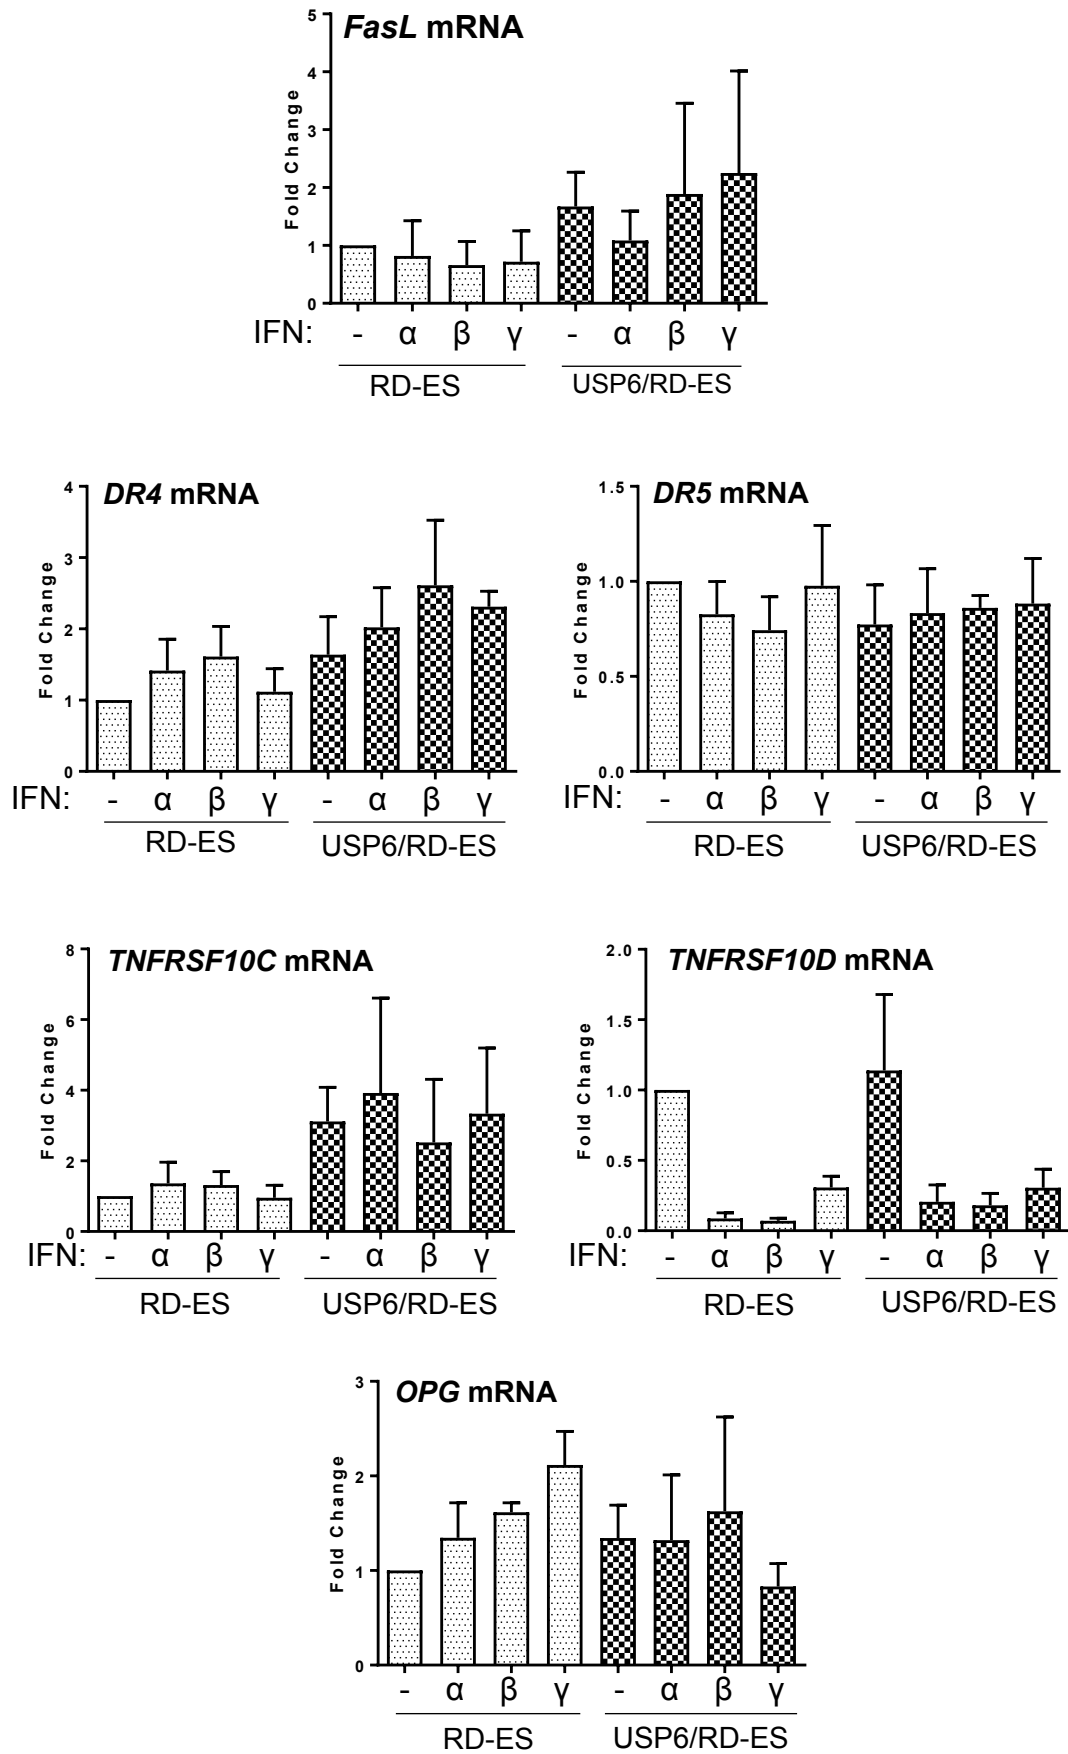

**Supplemental Figure S6**

Supplement: NIHMS1503368-supplement-6.pdf [file NIHMS1503368-supplement-6.pdf]
